# Supplementary material for: A cerium oxide@metal–organic framework nanoenzyme as a tandem catalyst for enhanced photodynamic therapy
Source: Royal Society of Chemistry journal article supplement (doi:10.1039/d1cc00001b), 2021-01-01
Supplement: d1cc00001b1.pdf [file d1cc00001b1.pdf]

Electronic Supplementary Information (ESI) for Chemical Communications

This journal is (c) The Royal Society of Chemistry 2020

## **Cerium oxide@metal–organic framework nanoenzyme as tandem catalyst for enhanced photodynamic therapy**

Jintong Liu,<sup>ab</sup> Lin Yao Ye,<sup>a</sup> Wei Hong Xiong,<sup>a</sup> Tianrui Liu,<sup>b</sup> Hong Yang,<sup>\*a</sup> and Jianping Lei<sup>\*b</sup>

<sup>a</sup> Department of Chemistry, College of Sciences, Nanjing Agricultural University, Nanjing 210095, China.

<sup>b</sup> State Key Laboratory of Analytical Chemistry for Life Science, School of Chemistry and Chemical Engineering, Nanjing University, Nanjing 210023, China.

### **Experimental**

**Materials and reagents.** Cerium (III) nitrate hexahydrate, polyvinyl pyrrolidone (PVP, Mw 30000), aminoterephthalic acid (NH<sub>2</sub>-BDC), 1-(3-(dimethylamino)propyl)-3-ethylcarbodiimide hydrochloride (EDC), methylene blue (MB), 1,3-diphenylisobenzofuran (DPBF), methylene blue (MB), N-hydroxysuccinimide (NHS), HOOC-poly(ethylene glycol)-folate (PEG-FA, Mw 2000), and D-glucose were purchased from Sigma-Aldrich (U.S.A). Hydrogen peroxide, iron (III) chloride hexahydrate (FeCl<sub>3</sub>·6H<sub>2</sub>O), ethanol, and ammonium hydroxide aqueous solution (30%) were obtained from Sinopharm Chemical Reagent Co. (China). Cell Counting Kit-8 (CCK-8) was provided by Dojindo (Japan). Tris (4,7-diphenyl-1,10-phenanthroline) ruthenium(II) dichloride ([Ru(dpp)<sub>3</sub>]Cl<sub>2</sub>) was acquired from J&K Chemical Technology Co., Ltd. (Beijing, China). Annexin V-FITC apoptosis detection kit was obtained from BD Biosciences (U.S.A).

LysoTracker Green and Hoechst 33342 were got from Invitrogen (Carlsbad, CA, U.S.A). EDVEDG-Cy3 (Cy3-p) as Caspase-3 specific substrate peptide was synthesized by ChinaPeptides Co., Ltd. (Shanghai, China). Ultrapure water ( $\geq 18.2 \text{ M}\Omega$ ; Millipore Co., U.S.A) was used throughout the experiment.

**Apparatus.** Dynamic light scattering (DLS) studies were carried out by a 90Plus instrument (Brook Haven, USA). UV-visible spectroscopic measurements were performed by using a UV-2600 spectrophotometer (Shimadzu Co., Japan). The Fourier Transform Infrared (FT-IR) spectra were detected with Nicolet iS5 FT-IR spectrometer (Thermo, USA). Powder X-ray diffraction (PXRD) was performed by a X'TRA diffractometer (ARL, Switzerland). The transmission electron microscopic (TEM) images were captured on a JEM-2100 high resolution transmission electron microscope (JEOL Ltd., Japan). Zeta potential experiments were done by a Zetasizer (Nano-Z, UK). The fluorescent measurement was carried out on a FluoroMax-4 spectrometer (HORIBA, Japan). Flow cytometric analysis was recorded on a Coulter FC-500 flow cytometer (Beckman-Coulter). CCK-8 assays were analyzed by Thermo Scientific Varioskan Flash (Thermo). The cell images were obtained from a TCS SP5 laser scanning confocal microscope (Leica, Germany).

**Synthesis of  $\text{CeO}_x$ .**  $\text{CeO}_x$  nanoparticles were synthesized by simple aqueous method with minor modifications.<sup>S1</sup> Briefly, cerium (III) nitrate hexahydrate (0.6 g) was mixed with 50 mL deionized aqueous solution containing 20 mM D-glucose. Then, aqueous ammonia ( $\text{NH}_4\text{OH}$ , 30%) was introduced into the solution slowly for homogeneity (pH 9). After stirred continuously for 12 h, the solution changed from colorless to yellow. The resultant mixture was applied on centrifugation at 3,000 rpm for 10 min to remove the oversized particles and agglomerates. The

supernatant was collected to centrifuge at 15,000 rpm for 0.5 h and washed with water thrice. The obtained CeO<sub>x</sub> nanoparticles were resuspended in deionized water for storage.

**Synthesis of CeO<sub>x</sub>@MIL.** For stepwise synthesis, 10 mg PVP (MW = 30,000) was added into 1 mL CeO<sub>x</sub> solution before the growth of MIL shell on the CeO<sub>x</sub>. The mixture of PVP and CeO<sub>x</sub> nanoparticles was shaken overnight at room temperature, followed by centrifuged at 15,000 rpm for 30 min to obtain PVP-CeO<sub>x</sub>. The PVP-CeO<sub>x</sub> was redispersed in a 10 mL precursor ethanol solution consisted of 13.5 mg FeCl<sub>3</sub>·6H<sub>2</sub>O and 9 mg NH<sub>2</sub>-BDC. The solution was heated at 40 °C for 1.5 h, centrifuged for 12000 rpm for 20 min, washed with ethanol twice, and redispersed in 10 ml ethanol to obtain the intermediate product. After adding additional 13.5 mg FeCl<sub>3</sub>·6H<sub>2</sub>O and 9 mg NH<sub>2</sub>-BDC, the intermediate ethanol solution was transferred into the water bath 40 °C for another 1 h. Finally, the precipitate was washed by ethanol by centrifugation at 8,000 rpm for 8 min to remove the excess regents. The resulted CeO<sub>x</sub>@MIL was redispersed in PBS for further use.

**Synthesis of CeO<sub>x</sub>@fMIL.** Before the surface functionalization of CeO<sub>x</sub>@MIL with target element (PEG-FA) and signal reporter (Cy3-pep), EDC (2 mg) and NHS (3 mg) were added into 1 mL PBS buffer containing PEG-FA (2 mg) and Cy3-pep (5 μM). After shaken for 60 min, the mixture was injected into the prepared CeO<sub>x</sub>@MIL solution (1 mL, 1 mg mL<sup>-1</sup>) followed by vortex at 20 °C for another 4 h. The precipitates were separated by centrifuging and washed with PBS thrice to gain the functionalized CeO<sub>x</sub>@MIL (CeO<sub>x</sub>@fMIL).

**Catalase Activity Assay.** The relative enzymatic activity of CeO<sub>x</sub> or CeO<sub>x</sub>@fMIL was determined by the Góth method.<sup>S2</sup> 20 μL CeO<sub>x</sub> or CeO<sub>x</sub>@fMIL was added into PBS buffer at different pHs (4.5, 6.5 and 7.4), treated with H<sub>2</sub>O<sub>2</sub> (1.0 mM) for the designed time, then

terminated by the addition of ammonium molybdate (1.0 mM) and cooled to room temperature. The enzymatic activity was calculated via UV–vis spectroscopy to detect the absorbance at 400 nm of a primrose stable complex, which formed by ammonium molybdate and residual hydrogen peroxide.

**Oxygen Generation by CeO<sub>x</sub>@fMIL.** In order to monitor the ability of CeO<sub>x</sub> and CeO<sub>x</sub>@fMIL for transferring H<sub>2</sub>O<sub>2</sub> to O<sub>2</sub>, the quenched O<sub>2</sub> indicator [(Ru(dpp)<sub>3</sub>)]Cl<sub>2</sub> was used in this assay. Briefly, 5 μM [(Ru(dpp)<sub>3</sub>)]Cl<sub>2</sub> was introduced into the nitrogen-saturated CeO<sub>x</sub> or CeO<sub>x</sub>@fMIL solution at pH 7.4 with or without 100 μM H<sub>2</sub>O<sub>2</sub>. The fluorescence intensity of [(Ru(dpp)<sub>3</sub>)]Cl<sub>2</sub> at 610 nm was recorded in different incubation times under the excitation at 488 nm. As for the intracellular assays, the method of oxygen generation measurement was similar with that in buffer. The confocal imaging photos were collected at the channel of 600-700 nm under the excitation at 488 nm.

**Measurement of ROS Generation.** To monitor the ROS generation by CeO<sub>x</sub> or CeO<sub>x</sub>@fMIL, a commercial UV-VIS indicator DPBF, whose absorbance of 410 nm could be decreased after incubated with ROS, was applied in the experiment via UV–vis spectroscopy. Typically, 20 μg mL<sup>-1</sup> DPBF was mixed with CeO<sub>x</sub>, CeO<sub>x</sub>@fMIL, MIL or MB in the oxygen-saturated PBS and irradiated with 660 nm laser for different periods of time. The ROS quantum yield (Φ<sub>Δ</sub>) was determined by the following eq. S1, in which MB (Φ<sub>Δ</sub>= 0.52) was used as the standard.<sup>S3</sup>

$$\Phi_{\Delta(x)} = \Phi_{\Delta(\text{std})} \times \frac{S_x}{S_{\text{std}}} \times \frac{F_{\text{std}}}{F_x} \quad \text{eq. S1}$$

where subscripted x and std referred to the sample and MB, respectively, S denoted the plot slope of the absorbance of DPBF (at 410 nm) vs. irradiation time, and F represented the

absorption correction factor, which was given by  $F = 1 - 10^{-OD}$  (OD stood for the optical density of sample and MB at 660 nm).

The extra ROS generation of  $CeO_x$  or  $CeO_x@fMIL$  in air, nitrogen or 5% oxygen at different pHs was investigated by the similar protocol. 20  $\mu$ L  $CeO_x$  or  $CeO_x@fMIL$  was incubated with or without 100  $\mu$ M  $H_2O_2$  and 20  $\mu$ g mL<sup>-1</sup> DPBF in different atmosphere-saturated PBS buffer at different pHs (4.5, 6.5 and 7.4), and then the changes of the DPBF absorbance at 410 nm were recorded for comparison.

**In Vitro Response to Caspase-3 by Fluorescence.** Twenty  $\mu$ L  $CeO_x@fMIL$  was mixed with different amounts of caspase-3 (0 to 10.0 Unit mL<sup>-1</sup>) in HEPES buffer (40 mM, pH 7.4) containing 1 mM EDTA, 0.1 M NaCl, 10% sucrose, 0.1% CHAPS and 10 mM DTT at 37 °C for the optimized time. The fluorescent response at 565 nm was recorded under an excitation wavelength at 543 nm.

**Evaluation of Cytotoxicity.** The cytotoxicity of  $CeO_x@fMIL$  on cells was assessed by CCK-8 analysis. Typically, HeLa or HaCaT cells ( $1.0 \times 10^5$ ) were seeded, cultured for 24 h, washed with PBS twice and incubated in Dulbecco's modified Eagle's culture medium containing increasing amount of  $CeO_x@fMIL$  for 6 h. The cells were washed with PBS and incubated with CCK-8 (10  $\mu$ L) at 37 °C for 2 h. The cell viability was determined by monitoring the absorbance at 450 nm and using control group with PBS for normalization. The cytotoxicity of  $CeO_x@fMIL$  against the incubation time was analyzed using the method similar to the mentioned above with the  $CeO_x@fMIL$  at 20  $\mu$ L.

**Confocal Imaging Assays.** The HeLa cells ( $5.0 \times 10^4$ ) were seeded in the confocal dishes and incubated at 37 °C overnight. Then fresh culture containing  $CeO_x@fMIL$  substitute for the

previous culture medium. After 6-h incubation, the cells were treated with LysoTracker Green (1.0  $\mu$ M) and Hoechst 33342 (1.0  $\mu$ M) for 20 min. The cellular confocal fluorescence images were collected at  $\lambda_{\text{ex/em}}$  of 488/510-550 nm for LysoTracker Green,  $\lambda_{\text{ex/em}}$  of 543/560-600 nm for  $\text{CeO}_x\text{@fMIL}$ , and  $\lambda_{\text{ex/em}}$  of 400/430-480 nm Hoechst 33342 for on the stack mode of a Leica confocal laser scanning microscope.

**Enhanced Therapy Efficacy.** HeLa cells ( $5.0 \times 10^4$ ) were cultured for 12 h in normoxic or hypoxic atmosphere (21% or 5% oxygen). The medium was replaced with f- $\text{CeO}_x$  or  $\text{CeO}_x\text{@fMIL}$  in PBS buffer. The cells were cultured for another 6 h and treated with a 660-nm at 200 mW  $\text{cm}^{-2}$  laser irradiation for 5 min. Thereafter, the cell fluorescent images were captured at  $\lambda_{\text{ex/em}}$  of 543/560-600 nm on the confocal laser scanning microscope. In the flow cytometry analysis, the HeLa cells were treated with the similar procedure and collected for further staining with Annexin V-FITC (5.0  $\mu$ L) and PI (5.0  $\mu$ L) for 15 min.

## Supplementary Data

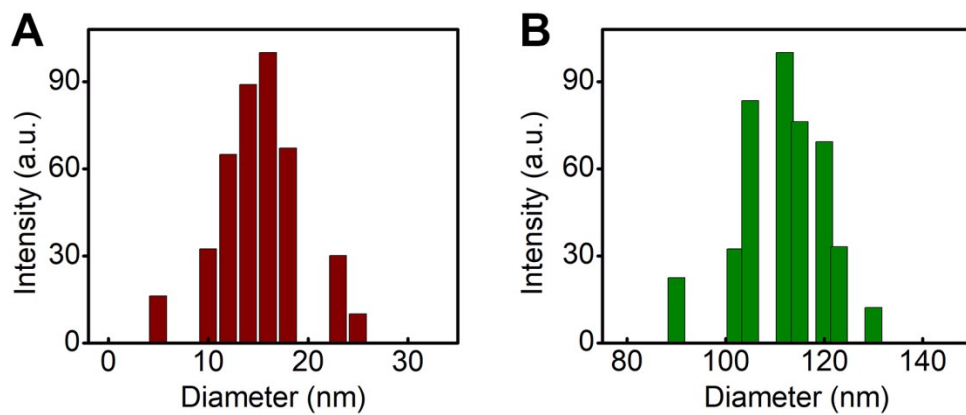

**Fig. S1** DLS assays of (A)  $\text{CeO}_x$  and (B)  $\text{CeO}_x@\text{MIL}$ .

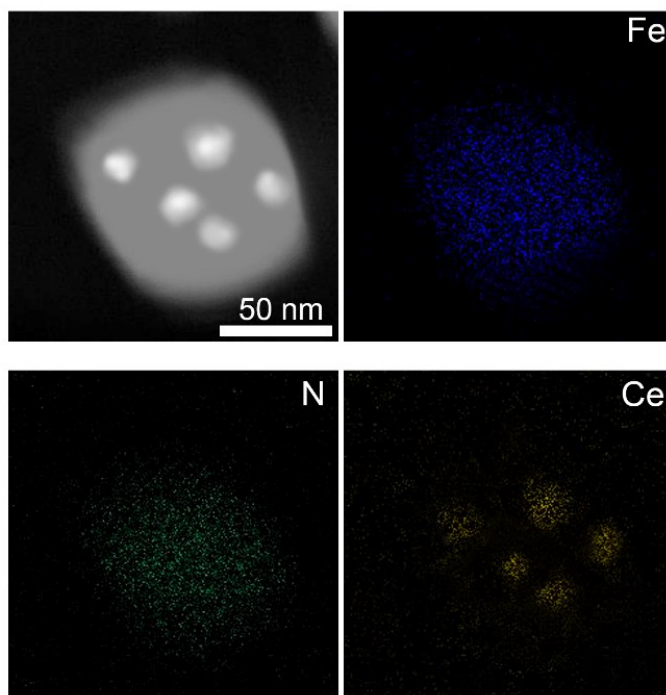

**Fig. S2** STEM image and energy dispersive X-ray spectroscopy (EDX) elemental mapping of  $\text{CeO}_x@\text{MIL}$  heterostructure.

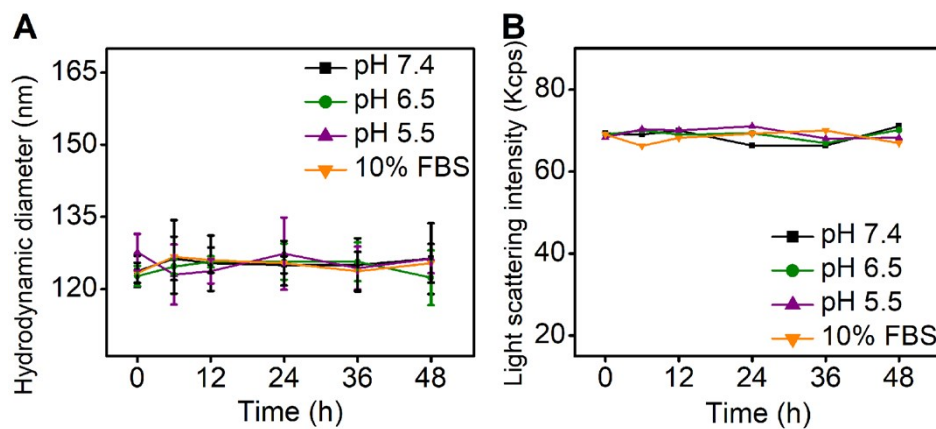

**Fig. S3** The stability of CeO<sub>x</sub>@fMIL in PBS at different pHs or at pH 7.4 with 10% fetal bovine serum by the measurements of (A) hydrodynamic diameter and (B) light scattering intensity.

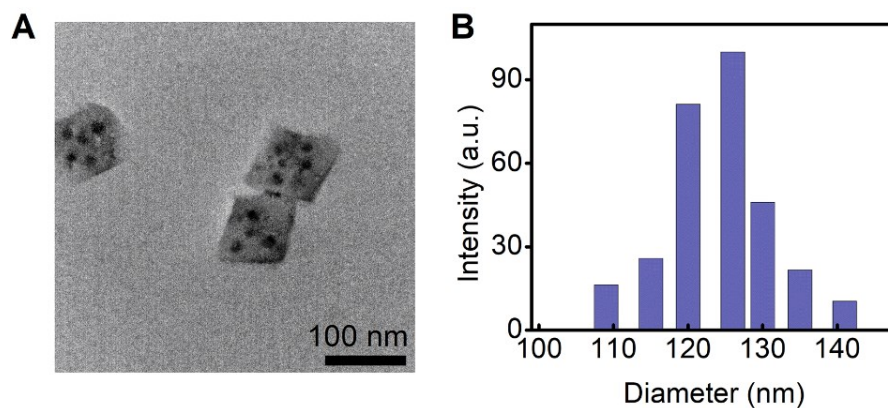

**Fig. S4** TEM image and DLS assay of CeO<sub>x</sub>@fMIL.



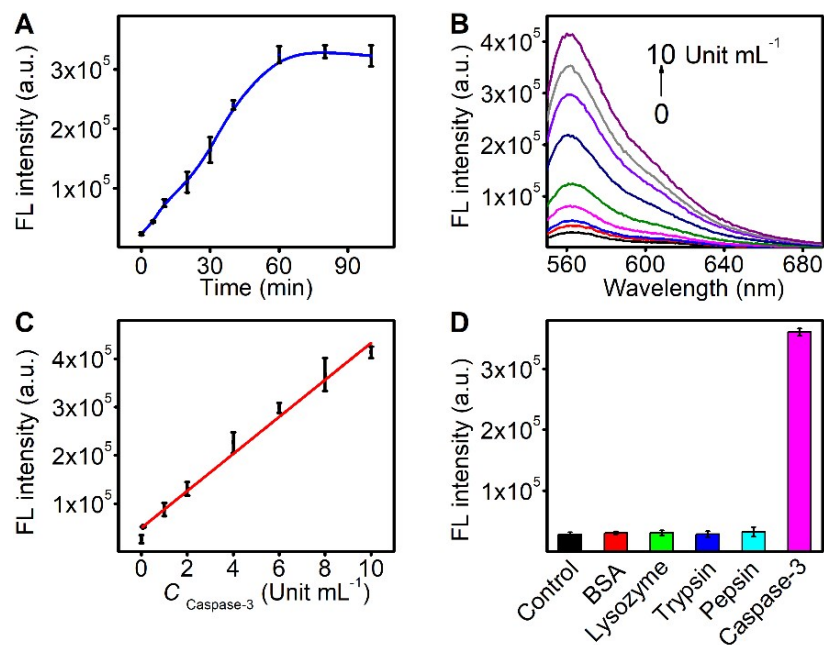

**Fig. S5** (A) Plot of fluorescence intensities of CeO<sub>x</sub>@fMIL at 565 nm vs. different incubation time with of caspase-3. (B) Fluorescence response of CeO<sub>x</sub>@fMIL to caspase-3 at the concentrations of 0, 0.05, 0.1, 1, 2, 4, 6, 8 and 10 Unit mL<sup>-1</sup>. (C) Plot of fluorescence intensities vs. caspase-3 concentration. (D) Fluorescent response of CeO<sub>x</sub>@fMIL to caspase-3 (6.0 Unit mL<sup>-1</sup>) and other proteins (1.0 μM).

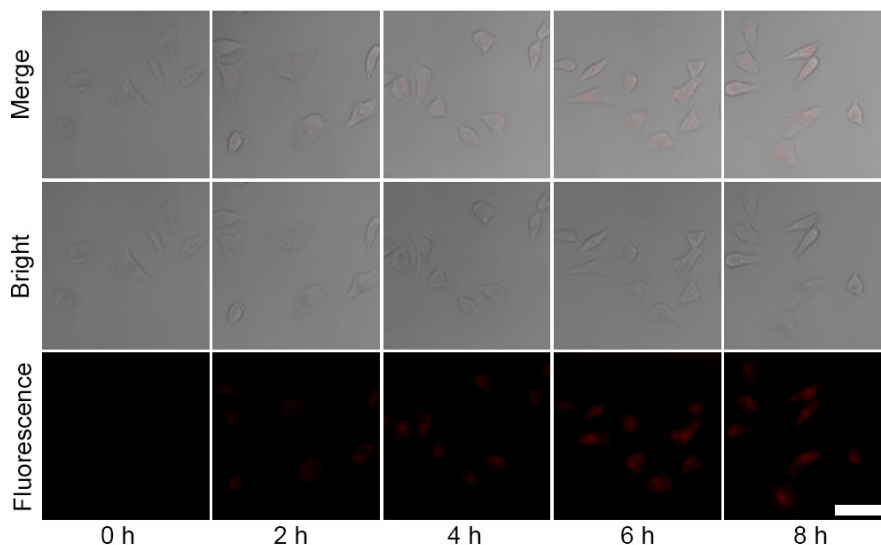

**Fig. S6** Cy3 fluorescence microscopic images of HeLa cells taken at different time points after being incubated with CeO<sub>x</sub>@fMIL at 37 °C. Scale bar: 50 μm.

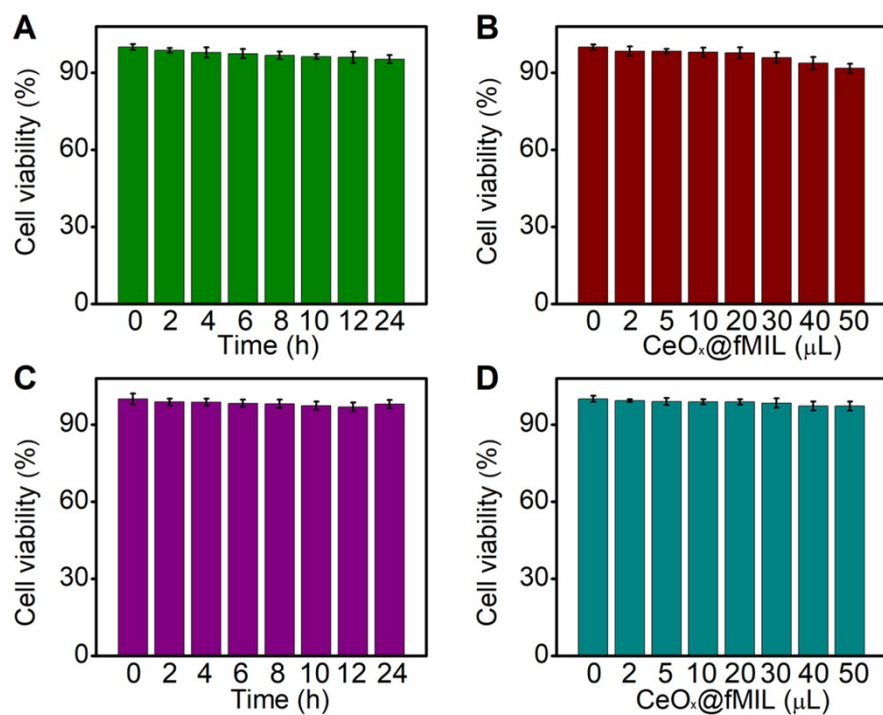

**Fig. S7** CCK-8 assays for (A) HeLa cells and (C) normal HaCaT cells after incubated with CeO<sub>x</sub>@fMIL for different time, and (B) HeLa cells and (D) normal HaCaT cells with increasing amounts of CeO<sub>x</sub>@fMIL for 6 h.

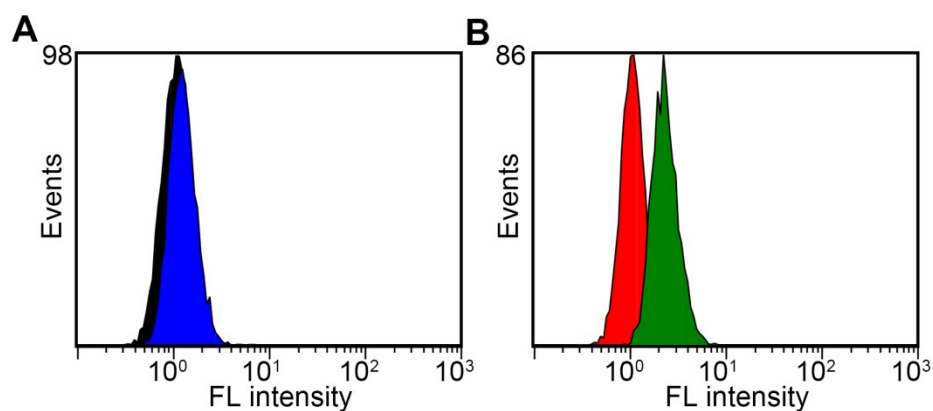

**Fig. S8** Flow cytometric assay of (A) HeLa cells and (B) HaCaT cells incubated with CeO<sub>x</sub>@fMIL for 6 h at 37 °C.

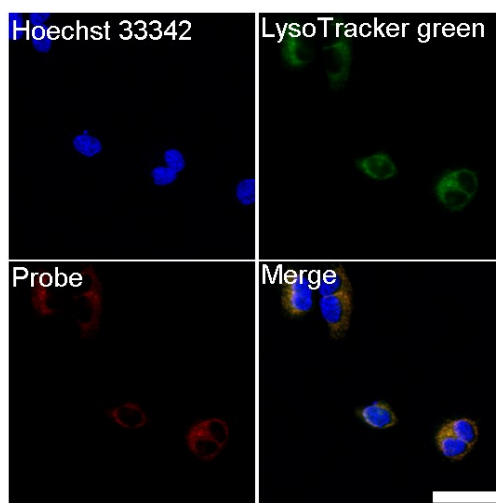

**Fig. S9** Colocalization images of  $\text{CeO}_x\text{@fMIL}$ -incubated HeLa cells with LysoTracker green (1.0  $\mu\text{M}$ ) and Hoechst 33342 (1.0  $\mu\text{M}$ ). Scale bar, 50  $\mu\text{m}$ .

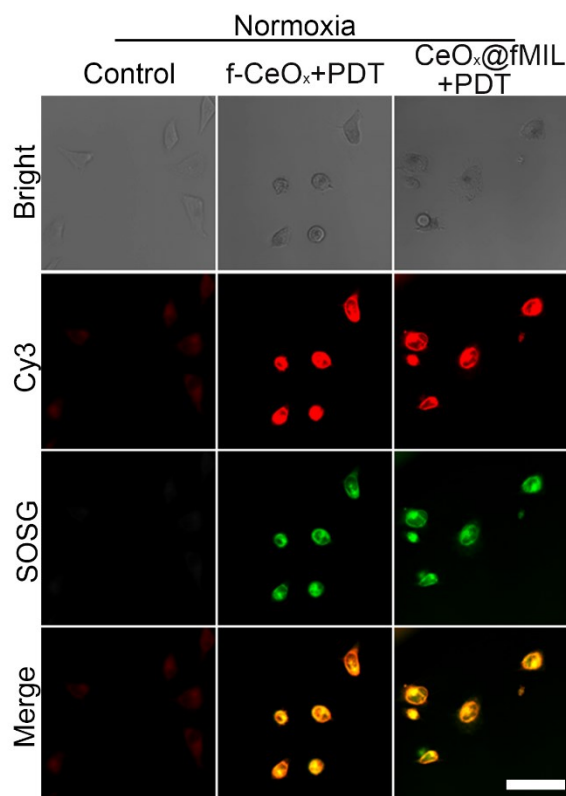

**Fig. S10** Confocal fluorescence images of HeLa cells treated with f- $\text{CeO}_x$  and  $\text{CeO}_x\text{@fMIL}$  under normoxic conditions by dual-channel of Cy3 for the  $\text{CeO}_x\text{@fMIL}$  or f- $\text{CeO}_x$  and SOSG for the monitoring of ROS after PDT. Scale bar: 50  $\mu\text{m}$ .

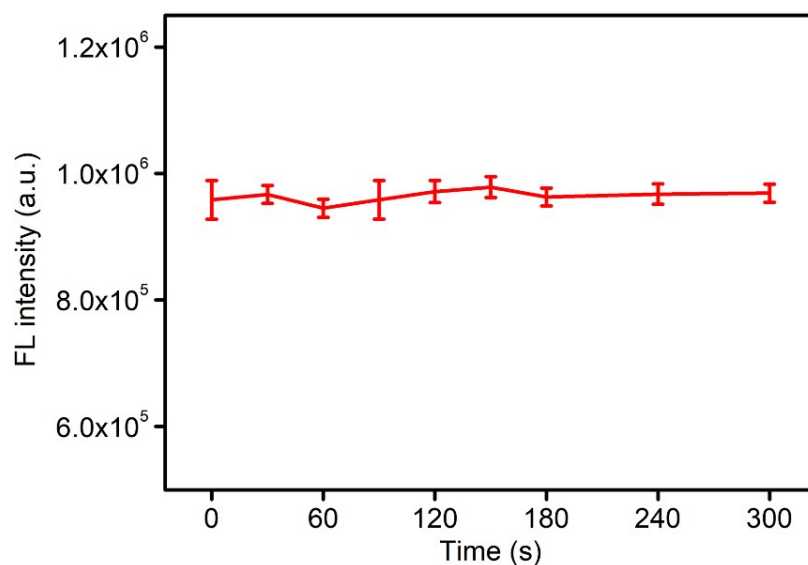

**Fig. S11** Dependence of fluorescence intensity of Cy3 in the presence of ROS generated by  $\text{CeO}_x\text{@MIL}$  on the irradiation time by laser at  $200 \text{ mW cm}^{-2}$ .

### Supporting References

- (S1) M. Li, P. Shi, C. Xu, J. S. Ren, and X. G. Qu, *Chem. Sci.*, 2013, **4**, 2536.
- (S2) G. S. Song, Y. Y. Chen, C. Liang, X. Yi, J. J. Liu, X. Q. Sun, S. D. Shen, K. Yang and Z. Liu, *Adv. Mater.*, 2016, **28**, 7143.
- (S3) J. W. Tian, L. Ding, H. J. Xu, Z. Shen, H. X. Ju, L. Jia, L. Bao and J. S. Yu, *J. Am. Chem. Soc.*, 2013, **135**, 18850.
